# Supplementary material for: The Predictors of Long COVID in Southeastern Italy
Source: MDPI journal article supplement (doi:10.3390/jcm12196303), 2023-09-29
Supplement: s1 [file s1]

**Table S1.** Subgroup analysis: comparison based on different levels of respiratory support.

|                                       | AA and Spontaneous Breath (n=136) | OT (n=190)      | NIV/CPAP (n=74) | ETI/tracheo (n=34) | P value  |
|---------------------------------------|-----------------------------------|-----------------|-----------------|--------------------|----------|
| Long Covid                            | 97 (70.3)                         | 143 (75.3)      | 47 (63.5)       | 26 (76.5)          | n.s.     |
| Sex F n(%)                            | 73 (52.9)                         | 79 (41.6)       | 29 (39.2)       | 9 (26.5)           | 0.020*   |
| Age (y)<br>IQ (25 - 75)               | 54 (45.25 – 62.75)                | 60 (53.25 – 69) | 60 (53.25 - 69) | 54 (46 - 59)       |          |
| BMI Kg/m <sup>2</sup><br>IQ (25 - 75) | 26 (23 - 30)                      | 28 (26 - 32)    | 28 (24 – 30.5)  | 32 (28 - 34)       | 0.005*   |
| Smoke n(%)<br>yes                     | 23 (16.8)                         | 10 (5.3)        | 6 (8.1)         | 3 (8.8)            | n.s.     |
| Charlson Index<br>IQ (25 - 75)        | 2 (0 - 3)                         | 2 (1 - 4)       | 2 (1-3)         | 2 (1 -3)           |          |
| DM n(%)                               | 23 (16.7)                         | 31 (16.3)       | 21 (28.4)       | 7 (20.6)           | n.s.     |
| AH n(%)                               | 61 (44.2)                         | 93 (48.9)       | 38 (51.4)       | 18 (52.9)          | n.s.     |
| CVD n(%)                              | 20 (14.5)                         | 43 (22.6)       | 11 (14.9)       | 11 (32.4)          | 0.046*   |
| COPD n(%)                             | 13 (9.4)                          | 38 (20.0)       | 15 (20.3)       | 8 (23.5)           | 0.038*   |
| ILD n(%)                              | 3 (2.2)                           | 8 (4.2)         | 2 (2.7)         | 0 (0)              | n.s.     |
| Other Pulmonary Disease n(%)          | 12 (8.7)                          | 14 (7.4)        | 6 (8.1)         | 7 (20.6)           | n.s.     |
| Cerebro Vascular Disease n(%)         | 8 (5.8)                           | 9 (4.7)         | 4 (5.4)         | 0 (0)              | n.s.     |
| Dyslipidemia n(%)                     | 32 (23.2)                         | 64 (33.7)       | 32 (43.2)       | 16 (47.1)          | 0.00622* |
| Dementia n(%)                         | 1 (0.7)                           | 3 (1.6)         | 2 (2.7)         | 0 (0)              | n.s.     |
| AD n(%)                               | 12 (8.7)                          | 13 (6.8)        | 3 (4.1)         | 2 (5.9)            | n.s.     |
| Immunosuppression n(%)                | 0 (0)                             | 1 (0.5)         | 1 (1.4)         | 1 (2.9)            | n.s.     |
| Hystory of Cancer n(%)                | 3 (2.2)                           | 14 (7.4)        | 3 (4.1)         | 1 (2.9)            | n.s.     |
| Current Cancer n(%)                   | 3 (2.1)                           | 8 (4.2)         | 5 (6.8)         | 0 (0)              | n.s.     |
| Dyspnoea T0 yes n(%)                  | 68 (49.3)                         | 121 (63.7)      | 35 (47.3)       | 22 (64.7)          | 0.015*   |
| Cough n (%)                           | 31 (22.5)                         | 190 (100)       | 71 (95.9)       | 34 (100)           | 0.000*   |
| Asthenia n (%)                        | 65 (47.4)                         | 190 (100)       | 72 (97.3)       | 34 (100)           | 0.000*   |
| Nausea T0 yes n(%)                    | 15 (10.9)                         | 16 (8.4)        | 6 (8.1)         | 1 (2.9)            | 0.000*   |
| Vomiting T0 yes n(%)                  | 8 (5.8)                           | 9 (4.7)         | 5 (6.8)         | 2 (5.9)            | n.s.     |
| Diarrhea T0 yes n(%)                  | 21 (15.2)                         | 31 (16.3)       | 13 (17.6)       | 5 (14.7)           | n.s.     |
| Headache T0 yes n(%)                  | 39 (28.3)                         | 38 (20.0)       | 21 (28.4)       | 6 (17.6)           | n.s.     |
| Anosmia T0 yes n(%)                   | 65 (47.1)                         | 57 (30.0)       | 25 (33.8)       | 11 (32.4)          | 0.014*   |
| Ageusia T0 yes n(%)                   | 59 (42.8)                         | 59 (31.1)       | 25 (33.8)       | 9 (26.5)           | n.s.     |
| Corticosteroid Therapy yes n(%)       | 85 (61.6)                         | 176 (92.6)      | 57 (77.0)       | 33 (97.1)          | 0.000*   |
| LMWH yes n(%)                         | 27 (19.6)                         | 162 (85.3)      | 46 (62.2)       | 32 (94.1)          | 0.000*   |
| Macrolide Therapy Yes n(%)            | 95 (68.8)                         | 169 (88.9)      | 63 (85.1)       | 32 (94.1)          | 0.000*   |
| $\beta$ -lactam antibiotics therapy   | 22 (15.9)                         | 106 (55.8)      | 28 (37.8)       | 30 (88.2)          | 0.000*   |
| Fluoroquinolones therapy              | 13 (11.0)                         | 11 (5.8)        | 3 (4.3)         | 1 (2.9)            | n.s.     |

|                                       |                |             |              |                |        |
|---------------------------------------|----------------|-------------|--------------|----------------|--------|
| Remdesivir therapy                    | 2 (1.4)        | 16 (8.4)    | 4 (5.4)      | 2 (5.9)        | n.s.   |
| Paxlovid therapy                      | 1 (0.7)        | 7 (3.7)     | 4 (5.4)      | 2 (5.9)        | n.s.   |
| Convalescent Plasma therapy           | 1 (0.7)        | 7 (3.7)     | 3 (4.1)      | 4 (11.8)       | 0.004* |
| Monoclonal Antibody therapy           | 0 (0.0)        | 2 (1.1)     | 2 (2.7)      | 0 (0)          | n.s.   |
| # Pneumonia Localization n(%)         |                |             |              |                | 0.000* |
| No Pneumonia                          | 18 (42.6)      | 0 (0)       | 1 (2.4)      | 0 (0)          |        |
| Monolateral                           | 6 (15.4)       | 54 (31.4)   | 15 (37.5)    | 6 (17.6)       |        |
| Bilateral                             | 15 (38.5)      | 118 (68.6)  | 26 (61.9)    | 28 (82.4)      |        |
| # Pnx yes n(%)                        | 0 (0)          | 4 (2.3)     | 1 (2.4)      | 0 (0)          | n.s.   |
| ## PIE n(%)                           | 0 (0)          | 8 (4.7)     | 4 (9.5)      | 6 (17.6)       | 0.009* |
| PE yes n(%)                           | 0 (0)          | 11 (10.8)   | 2 (10.0)     | 4 (16.7)       | n.s.   |
| COVID19+ duration day<br>IQ (25 - 75) | 21.5 (16 - 30) | 25 (17 -32) | 22 (16 - 32) | 27 (22.5 - 38) |        |
| Reinfection n(%)                      | 13 (9.4)       | 12 (6.3)    | 3 (4.1)      | 3 (8.8)        | n.s.   |
| Number Vaccine doses IQ (25 - 75)     | 1 (0 - 1)      | 0 (0 - 1)   | 1 (0 - 1)    | 0 (0 - 1)      | n.s.   |

Abbreviations: IQ 25-75= Interquartile 25 – 75%; Pt= patients; y=years; BMI= Body Mass Index; Kg/m<sup>2</sup>= Kilogram/meter<sup>2</sup>; DM=diabetes mellitus arterial: AH= arterial hypertension; CVD= cardiovascular disease; COPD=chronic obstructive pulmonary disease; ILD= intestinal lung disease; AD= autoimmune disease; ICU=Intensive Care Unit; ARF=Acute Respiratory Failure Yes; TOT Symptoms T0= number of symptoms at T0 time; LMWH= Low Molecular Weight Heparin; AA= Ambient Air; OT= Oxygen Therapy; NIV= Non Invasive Ventilation; CPAP=Continuous Positive Airway Pressure; ETI=Endotracheal intubation; Tracheo= tracheotomy; PNx= Pneumothorax; PIE= Pleural Effusion; PE=Pulmonary Embolism; n.s.= not significant.

#= 149 missing value; ##=271 missing value

\*: p value< 0.050

**Table S2.** Comparison Long Covid to Recovered Covid-19 within the subgroups of home care and hospitalization in terms of the therapy administered during the acute phase.

|                                     | HOME CARE GROUP n =193   |                              |         | HOSPITALIZATION GROUP |                            |         |
|-------------------------------------|--------------------------|------------------------------|---------|-----------------------|----------------------------|---------|
|                                     | Long Covid-19 pt (n=130) | Recovered Covid-19 pt (n=63) | P value | Long Covid-19 pt (n=) | Recovered Covid-19 pt (n=) | P value |
| Corticosteroid Therapy yes n(%)     | 85 (65.4)                | 32 (50.8)                    | 0.037   | 179 (97.8)            | 55 (91.7)                  | 0.043*  |
| LMWH yes n(%)                       | 32 (24.6)                | 12 (19.0)                    | n.s.    | 167 (91.3)            | 56 (93.3)                  | n.s.    |
| Macrolide Therapy Yes n(%)          | 88 (67.7)                | 44 (67.7)                    | n.s.    | 172 (94.0)            | 57 (95.0)                  | n.s.    |
| $\beta$ -lactam antibiotics therapy | 10 (7.7)                 | 6 (9.5)                      | n.s.    | 128 (69.9)            | 42 (70)                    | n.s.    |
| Fluoroquinolones therapy            | 17 (14.3)                | 5 (10.2)                     | n.s.    | 5 (2.7)               | 1 (1.7)                    | n.s.    |
| Remdesivir therapy #                |                          |                              |         | 18 (9.8)              | 6 (10.0)                   | n.s.    |
| Nirmatrelvir/ritonavir therapy #    |                          |                              |         | 10 (5.5)              | 4 (6.7)                    | n.s.    |
| Convalescent Plasma therapy #       |                          |                              |         | 12 (6.6)              | 3 (5.0)                    | n.s.    |
| Monoclonal Antibody therapy #       |                          |                              |         | 3 (1.6)               | 0 (0)                      | n.s.    |

Abbreviation:LMWH= Low Molecular Weight Heparin

n.s.= not significant

# No home prescriptions

\*: p value< 0.050

**Table S3.** Prediction of Long Covid

|                            | Univariate Logistic Regression |               |         | Multivariate Model 1 |               |         |                       | Multivariate Model 2 |               |         |                       |
|----------------------------|--------------------------------|---------------|---------|----------------------|---------------|---------|-----------------------|----------------------|---------------|---------|-----------------------|
|                            | ODD                            | CI 95%        | P value | ODD                  | CI 95%        | P value | AUC                   | ODD                  | CI 95%        | P value | AUC                   |
| Sex M                      | 0.637                          | 0.414 – 0.980 | 0.040*  | 0.513                | 0.316 – 0.833 | 0.007*  | 0.646 (0.586 – 0.705) | 0.507                | 0.311 – 0.827 | 0.006   | 0.645 (0.585 – 0.706) |
| Age (y)                    | 1.000                          | 0.984 – 1.016 | 0.976   |                      |               |         |                       |                      |               |         |                       |
| BMI Kg/m <sup>2</sup>      | 1.051                          | 1.005 – 1.098 | 0.028*  |                      |               |         |                       | 1.046                | 0.998 – 1.096 | 0.063   |                       |
| Home Care/Hospitalization  | 0.677                          | 0.445 – 1.029 | 0.068   |                      |               |         |                       | 0.910                | 0.539 – 1.536 | 0.724   |                       |
| Dyspnea T0 yes             | 1.686                          | 1.107 – 2.566 | 0.015 * |                      |               |         |                       | 1.333                | 0.834 – 2.130 | 0.229   |                       |
| Corticosteroid Therapy yes | 1.895                          | 1.143 – 3.140 | 0.013*  |                      |               |         |                       | 2.151                | 1.159 – 3.993 | 0.015   |                       |

Abbreviation:

BMI= Body Mass Index

n.s.= not significant

# No home prescriptions

\*: p value&lt; 0.050
